# Supplementary material
Source: Springer Nature journal article supplement (https://www.springermedizin.de/resource/supplementary/13075_2011_3527_MOESM3_ESM.pdf/9694746)
Supplement: MOESM3 [file 9694746]

A

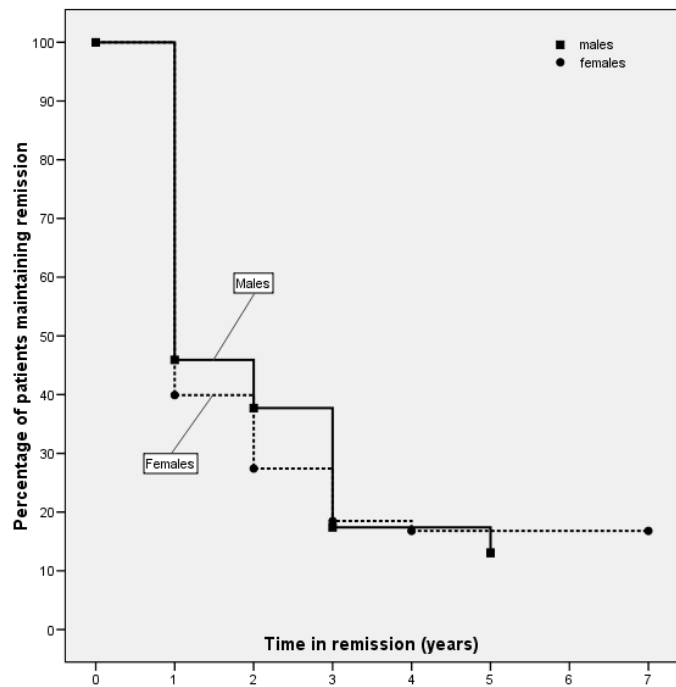

|                |     |                   |                  |                  |                  |                   |                 |                 |
|----------------|-----|-------------------|------------------|------------------|------------------|-------------------|-----------------|-----------------|
| <b>Males</b>   | 61  | 28 / 61<br>(46%)  | 23 / 28<br>(82%) | 6 / 13<br>(46%)  | 4 / 4<br>(100%)  | 3 / 4<br>(75%)    |                 |                 |
| <b>Females</b> | 248 | 99 / 248<br>(40%) | 68 / 99<br>(69%) | 31 / 46<br>(67%) | 20 / 22<br>(91%) | 14 / 14<br>(100%) | 8 / 8<br>(100%) | 1 / 1<br>(100%) |

B

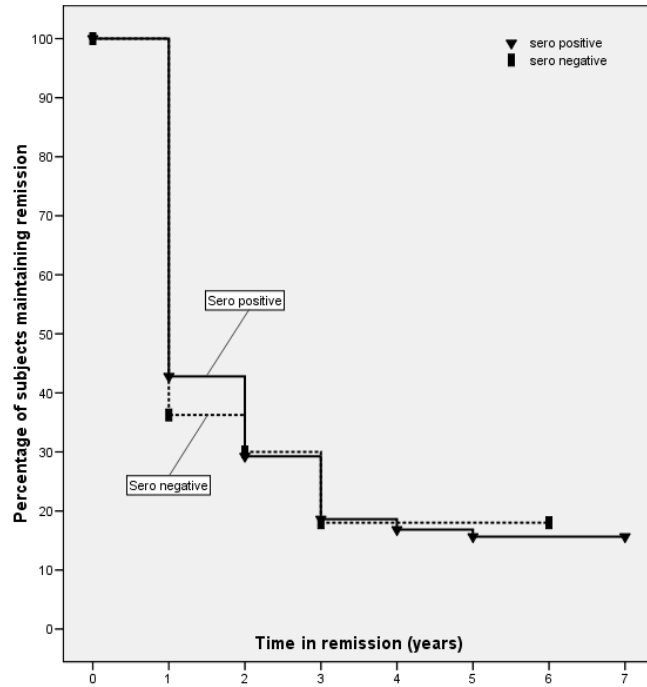

|                      |     |                   |                  |                  |                  |                  |                 |                 |
|----------------------|-----|-------------------|------------------|------------------|------------------|------------------|-----------------|-----------------|
| <b>Sero positive</b> | 229 | 98 / 229<br>(43%) | 67 / 98<br>(68%) | 28 / 44<br>(64%) | 19 / 21<br>(90%) | 13 / 14<br>(93%) | 6 / 6<br>(100%) | 1 / 1<br>(100%) |
| <b>Sero negative</b> | 80  | 29 / 80<br>(36%)  | 24 / 29<br>(83%) | 9 / 15<br>(60%)  | 5 / 5<br>(100%)  | 4 / 4<br>(100%)  | 2 / 2<br>(100%) |                 |

C

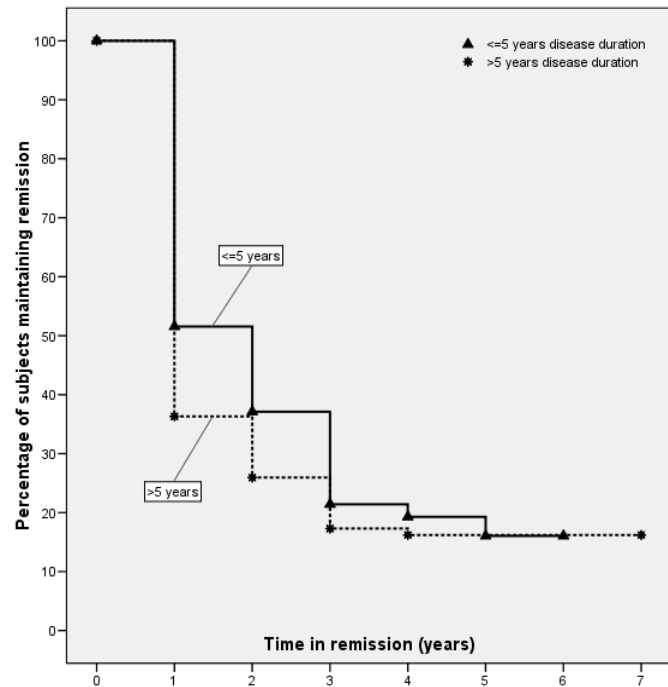

|                     |     |                   |                  |                  |                  |                   |                 |                 |
|---------------------|-----|-------------------|------------------|------------------|------------------|-------------------|-----------------|-----------------|
| <b>&lt;=5 years</b> | 97  | 50 / 97<br>(52%)  | 36 / 50<br>(72%) | 15 / 26<br>(58%) | 9 / 10<br>(90%)  | 5 / 6<br>(83%)    | 1 / 1<br>(100%) |                 |
| <b>&gt;5 years</b>  | 212 | 77 / 212<br>(36%) | 55 / 77<br>(71%) | 22 / 33<br>(67%) | 15 / 16<br>(94%) | 12 / 12<br>(100%) | 7 / 7<br>(100%) | 1 / 1<br>(100%) |
